# Supplementary material for: Cu@Au(Ag)/Pt nanocomposite as peroxidase mimic and application of Cu@Au/Pt in colorimetric detection of glucose and l-cysteine
Source: Royal Society of Chemistry journal article supplement (doi:10.1039/c9ra08547e), 2019-01-01
Supplement: c9ra08547e1.pdf [file c9ra08547e1.pdf]

Supporting for

## **Cu@Au(Ag)/Pt nanocomposite as peroxidase mimic and application of Cu@Au/Pt in colorimetric detection of glucose and L-cysteine**

Cuifeng Jiang,<sup>a</sup> Xiaoxiu Wei,<sup>a</sup> Shuai Bao,<sup>a</sup> Huajian Tu<sup>a</sup> and Wei Wang<sup>\*b</sup>

<sup>a</sup>*School of Materials Science and Engineering, Yancheng Institute of Technology, Yancheng, Jiangsu, China, 224051.*

<sup>b</sup>*School of Chemistry and Chemical Engineering, Yancheng Institute of Technology, Yancheng, Jiangsu, China, 224051.*

*\*Corresponding author Email: wangw@ycit.edu.cn, ycitwangw@163.com*

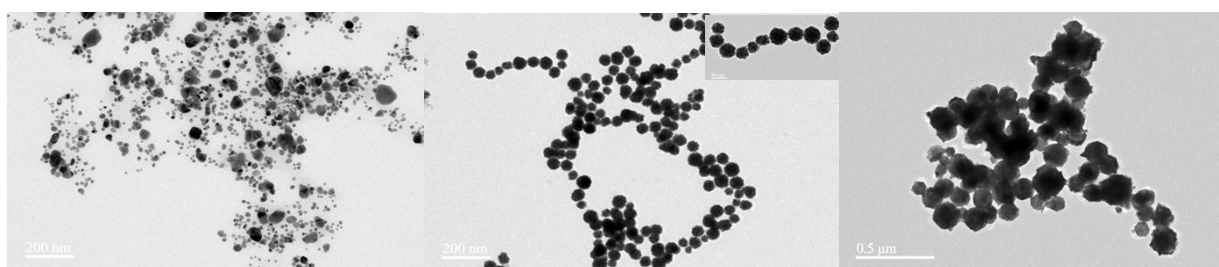

Figure S1. TEM images of Cu@Ag, Cu@Ag/Pt and Cu@Ag/Pd nanoparticles

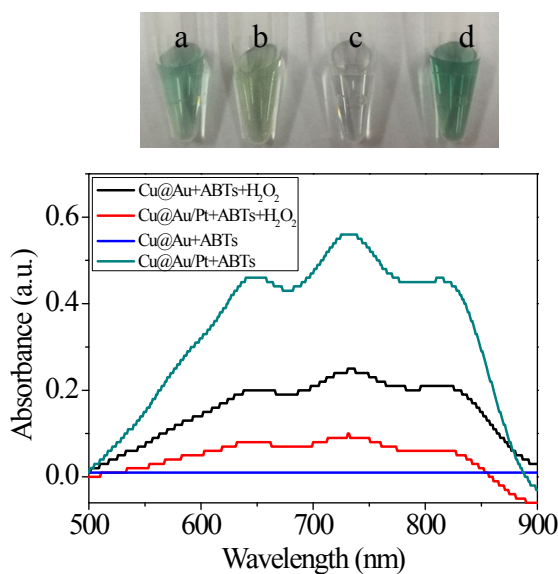

Figure S2. Photo images and uv-vis absorption spectra for (a) Cu@Au+ABTs+H<sub>2</sub>O<sub>2</sub> (b) Cu@Au/Pt+ABTs+H<sub>2</sub>O<sub>2</sub> (c) Cu@Au+ABTs (d) Cu@Au/Pt+ABTs

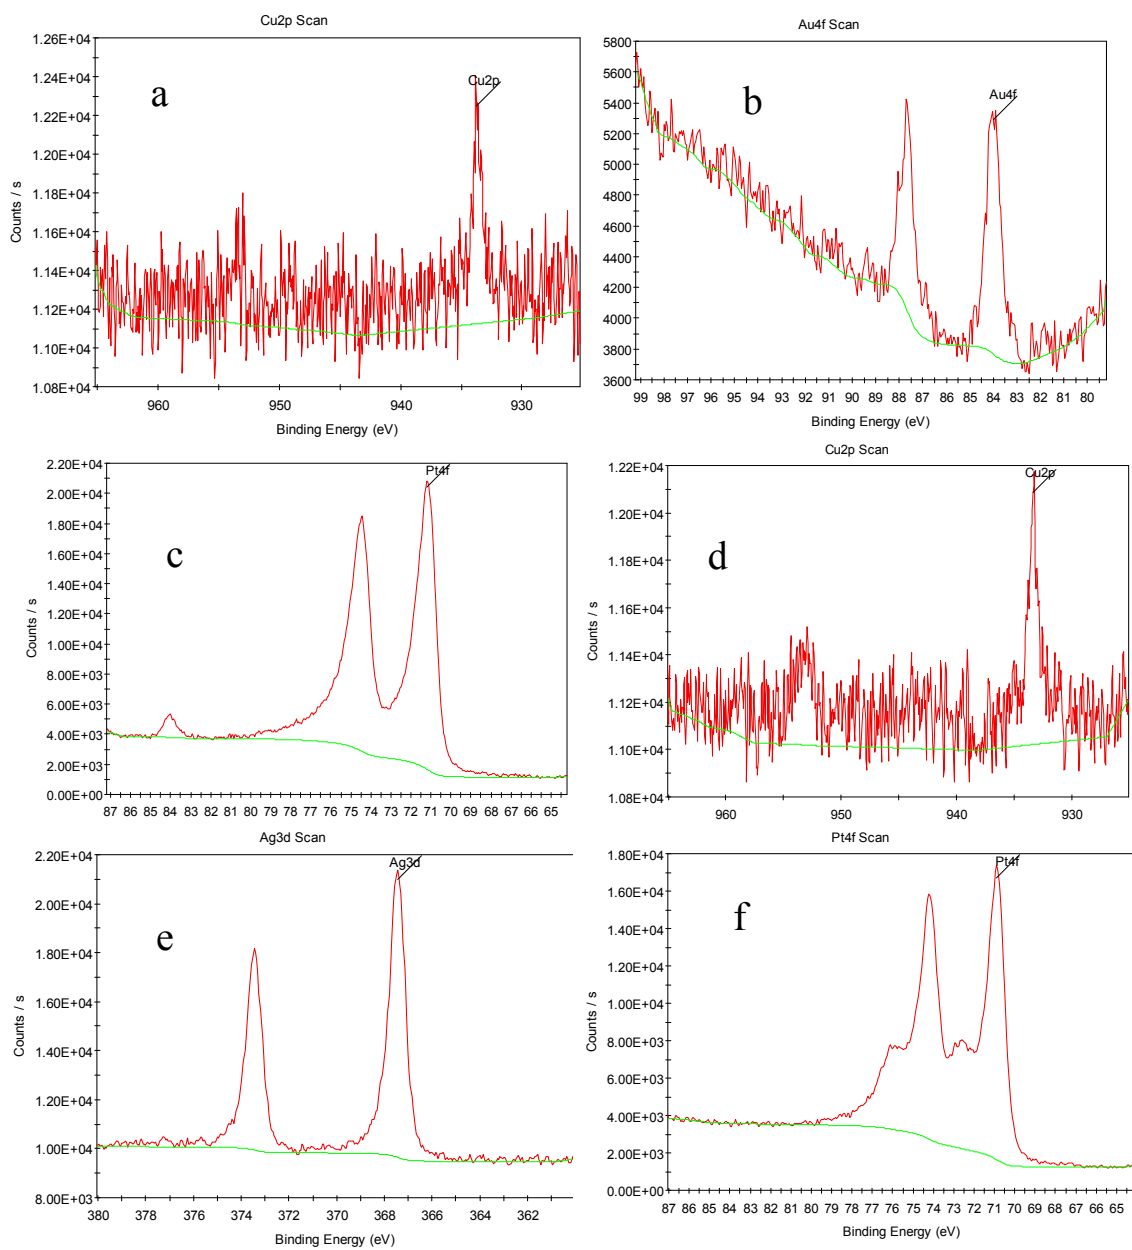

Figure S3. XPS spectra of Cu@Au/Pt (a) Cu<sub>2p</sub> (b) Au<sub>4f</sub> (c) Pt<sub>4f</sub> and Cu@Ag/Pt (d) Cu<sub>2p</sub> (e) Ag<sub>3d</sub> (f) Pt<sub>4f</sub>

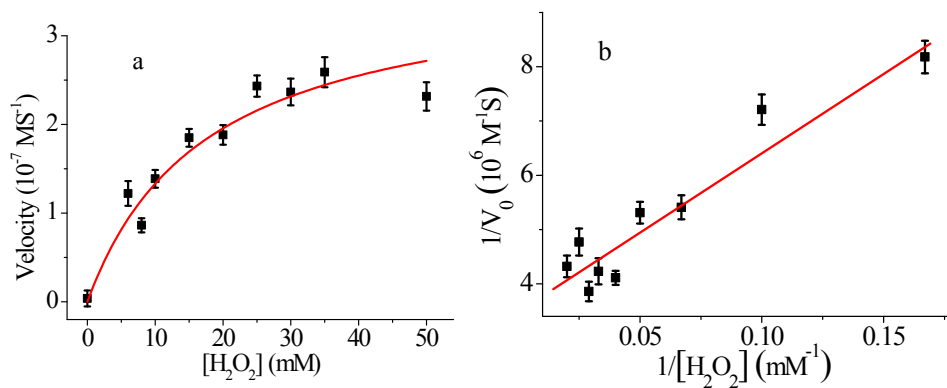

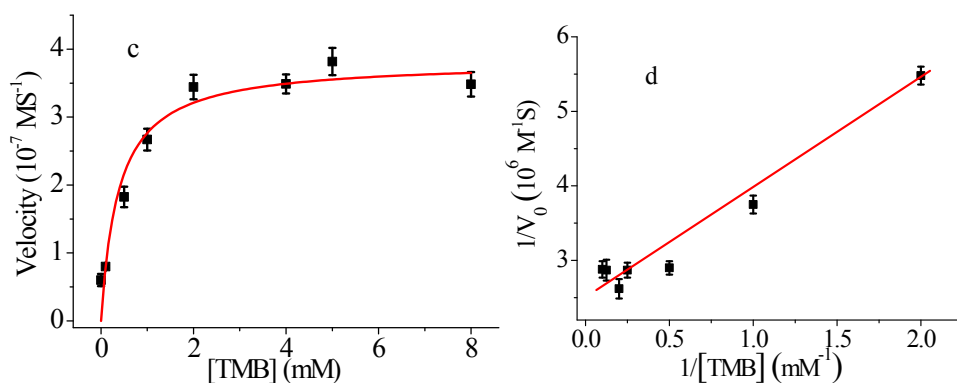

Figure S4. Steady-state kinetic assays of the R-Cu@Ag/Pt. (a) varying  $\text{H}_2\text{O}_2$  concentration with fixed TMB concentration (5 mM). (c) varying TMB concentration with fixed  $\text{H}_2\text{O}_2$  concentration (30 mM). (b, d) Lineweaver-Burk plots of the double reciprocal of the Michaelis-Menten equation.

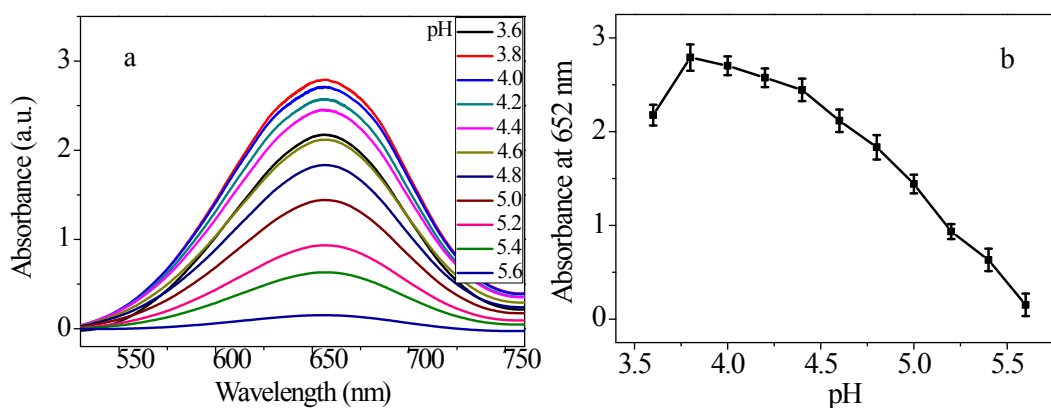

Figure S5. (a) Absorbance spectra of Cu@Au/Pt+TMB+ $\text{H}_2\text{O}_2$  in acetate buffer with different pH (b) Absorbance at 652 nm vs pH .

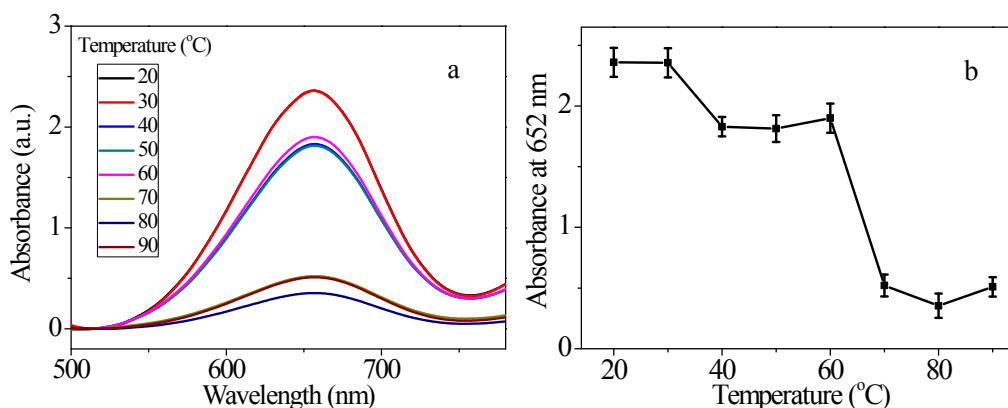

Figure S6. (a) Absorbance spectra of Cu@Au/Pt+TMB+ $\text{H}_2\text{O}_2$  under different temperature and (b)  $\Delta A_{652\text{nm}}$  vs Temperature.

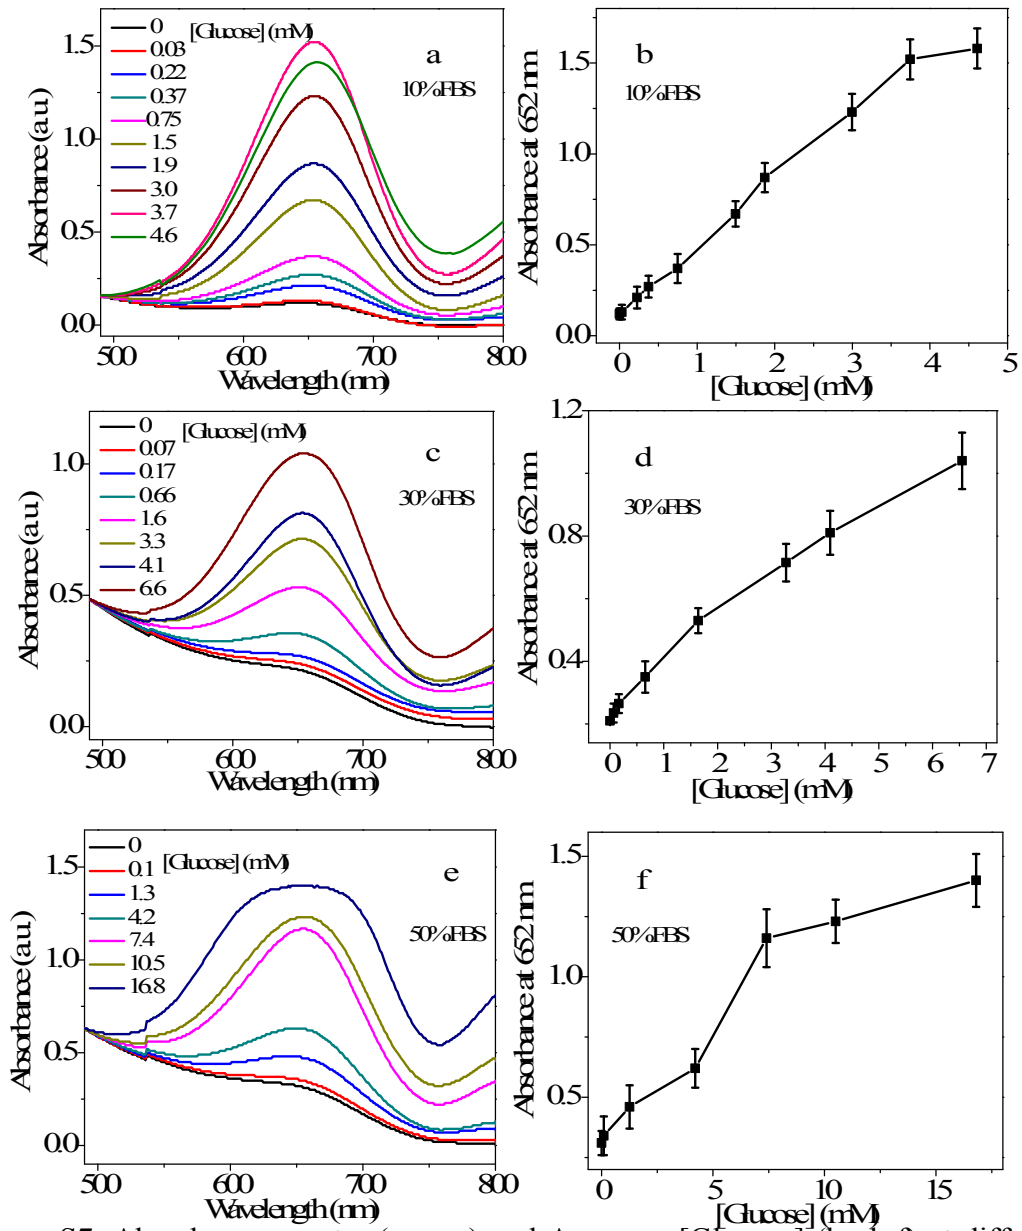

Figure S7. Absorbance spectra (a, c, e) and  $A_{652\text{nm}}$  vs [Glucose] (b, d, f) at different volume ratio (percentage) of serum (a, b) 10%, (c, d) 30%, (e, f) 50%

Table S1. Summarization of glucose LOD in serum with different volume ratios

| Serum Ratio | LOD ( $\mu\text{M}$ ) |
|-------------|-----------------------|
| 0           | 6                     |
| 10%         | 15                    |
| 30%         | 50                    |
| 50%         | 80                    |

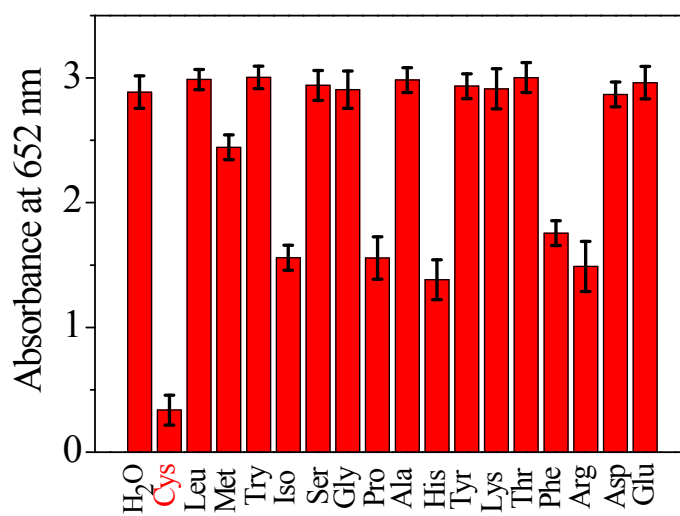

Figure S8. Absorbance intensity at 652 nm in the presence of 2.5 mM various amino acids

Table S2. Recovery measurements of cysteine in tap water

| Analytes | Spiked ( $\mu\text{M}$ ) | Found ( $\mu\text{M}$ ) | Recovery (%) |
|----------|--------------------------|-------------------------|--------------|
| cysteine | 0.1                      | 0.098                   | 98           |
|          | 1                        | 1.16                    | 116          |
|          | 2                        | 2.16                    | 108          |
